# Supplementary material
Source: publisher site journal article supplement (https://www.spandidos-publications.com/7129/downloadSupplementary)
Supplement: Supplementary file 1 [file downloadSupplementary]

## Sheet: Sheet1
Table SVI. Interactions of all mutated genes.
A, Hyp group (n=16)
Gene 1	Gene 2	P-value	Odds ratio	0	11	1	10	Event	Pair
APC	ALK	0.0588235	Inf	16	1	0	0	Co-occurrence	ALK, APC
FGFR3	ALK	0.0588235	Inf	16	1	0	0	Co-occurrence	ALK, FGFR3
HRAS	ALK	0.0588235	Inf	16	1	0	0	Co-occurrence	ALK, HRAS
RET	ALK	0.0588235	Inf	16	1	0	0	Co-occurrence	ALK, RET
SOD2	ALK	0.0588235	Inf	16	1	0	0	Co-occurrence	ALK, SOD2
FGFR3	APC	0.0588235	Inf	16	1	0	0	Co-occurrence	APC, FGFR3
HRAS	APC	0.0588235	Inf	16	1	0	0	Co-occurrence	APC, HRAS
RET	APC	0.0588235	Inf	16	1	0	0	Co-occurrence	APC, RET
SOD2	APC	0.0588235	Inf	16	1	0	0	Co-occurrence	APC, SOD2
HRAS	FGFR3	0.0588235	Inf	16	1	0	0	Co-occurrence	FGFR3, HRAS
RET	FGFR3	0.0588235	Inf	16	1	0	0	Co-occurrence	FGFR3, RET
SOD2	FGFR3	0.0588235	Inf	16	1	0	0	Co-occurrence	FGFR3, SOD2
RET	HRAS	0.0588235	Inf	16	1	0	0	Co-occurrence	HRAS, RET
SOD2	HRAS	0.0588235	Inf	16	1	0	0	Co-occurrence	HRAS, SOD2
SOD2	RET	0.0588235	Inf	16	1	0	0	Co-occurrence	RET, SOD2
UGT1A1	SMO	0.0588235	Inf	16	1	0	0	Co-occurrence	SMO, UGT1A1
ERBB2	ALK	0.117647	Inf	15	1	0	1	Co-occurrence	ALK, ERBB2
FBXW7	ALK	0.117647	Inf	15	1	0	1	Co-occurrence	ALK, FBXW7
ERBB2	APC	0.117647	Inf	15	1	0	1	Co-occurrence	APC, ERBB2
FBXW7	APC	0.117647	Inf	15	1	0	1	Co-occurrence	APC, FBXW7
FBXW7	CDKN2A	0.117647	Inf	15	1	0	1	Co-occurrence	CDKN2A, FBXW7
ERBB2	FGFR3	0.117647	Inf	15	1	0	1	Co-occurrence	ERBB2, FGFR3
FBXW7	FGFR3	0.117647	Inf	15	1	0	1	Co-occurrence	FBXW7, FGFR3
ERBB2	HRAS	0.117647	Inf	15	1	0	1	Co-occurrence	ERBB2, HRAS
FBXW7	HRAS	0.117647	Inf	15	1	0	1	Co-occurrence	FBXW7, HRAS
ERBB2	RET	0.117647	Inf	15	1	0	1	Co-occurrence	ERBB2, RET
FBXW7	RET	0.117647	Inf	15	1	0	1	Co-occurrence	FBXW7, RET
ERBB2	SOD2	0.117647	Inf	15	1	0	1	Co-occurrence	ERBB2, SOD2
FBXW7	SOD2	0.117647	Inf	15	1	0	1	Co-occurrence	FBXW7, SOD2
FBXW7	ERBB2	0.227941	10.247	14	1	1	1	Co-occurrence	ERBB2, FBXW7
CBR3	EGFR	0.294118	0	4	0	12	1	Mutually exclusive	CBR3, EGFR
CDKN2A	EGFR	0.294118	0	4	0	12	1	Mutually exclusive	CDKN2A, EGFR
CBR3	TP53	0.470588	0	7	0	9	1	Mutually exclusive	CBR3, TP53
SMO	TP53	0.470588	0	7	0	9	1	Mutually exclusive	SMO, TP53
UGT1A1	TP53	0.470588	0	7	0	9	1	Mutually exclusive	TP53, UGT1A1
ERBB2	TP53	0.470588	Inf	8	2	7	0	Co-occurrence	ERBB2, TP53
FBXW7	TP53	0.470588	Inf	8	2	7	0	Co-occurrence	FBXW7, TP53
EGFR	FBXW7	0.514706	0.389249	4	1	1	11	Mutually exclusive	EGFR, FBXW7
EGFR	ERBB2	1	Inf	5	2	0	10	Co-occurrence	EGFR, ERBB2
ERBB2	CBR3	1	0	14	0	1	2	Mutually exclusive	CBR3, ERBB2
FBXW7	CBR3	1	0	14	0	1	2	Mutually exclusive	CBR3, FBXW7
ERBB2	CDKN2A	1	0	14	0	1	2	Mutually exclusive	CDKN2A, ERBB2
ERBB2	SMO	1	0	14	0	1	2	Mutually exclusive	ERBB2, SMO
FBXW7	SMO	1	0	14	0	1	2	Mutually exclusive	FBXW7, SMO
ERBB2	UGT1A1	1	0	14	0	1	2	Mutually exclusive	ERBB2, UGT1A1
FBXW7	UGT1A1	1	0	14	0	1	2	Mutually exclusive	FBXW7, UGT1A1
TP53	EGFR	1	0.682725	2	6	6	3	Mutually exclusive	EGFR, TP53
ALK	EGFR	1	Inf	5	1	11	0	Co-occurrence	ALK, EGFR
APC	EGFR	1	Inf	5	1	11	0	Co-occurrence	APC, EGFR
FGFR3	EGFR	1	Inf	5	1	11	0	Co-occurrence	EGFR, FGFR3
HRAS	EGFR	1	Inf	5	1	11	0	Co-occurrence	EGFR, HRAS
RET	EGFR	1	Inf	5	1	11	0	Co-occurrence	EGFR, RET
SMO	EGFR	1	Inf	5	1	11	0	Co-occurrence	EGFR, SMO
SOD2	EGFR	1	Inf	5	1	11	0	Co-occurrence	EGFR, SOD2
UGT1A1	EGFR	1	Inf	5	1	11	0	Co-occurrence	EGFR, UGT1A1
ALK	TP53	1	Inf	8	1	8	0	Co-occurrence	ALK, TP53
APC	TP53	1	Inf	8	1	8	0	Co-occurrence	APC, TP53
CDKN2A	TP53	1	Inf	8	1	8	0	Co-occurrence	CDKN2A, TP53
FGFR3	TP53	1	Inf	8	1	8	0	Co-occurrence	FGFR3, TP53
HRAS	TP53	1	Inf	8	1	8	0	Co-occurrence	HRAS, TP53
RET	TP53	1	Inf	8	1	8	0	Co-occurrence	RET, TP53
SOD2	TP53	1	Inf	8	1	8	0	Co-occurrence	SOD2, TP53
CBR3	ALK	1	0	15	0	1	1	Mutually exclusive	ALK, CBR3
CDKN2A	ALK	1	0	15	0	1	1	Mutually exclusive	ALK, CDKN2A
SMO	ALK	1	0	15	0	1	1	Mutually exclusive	ALK, SMO
UGT1A1	ALK	1	0	15	0	1	1	Mutually exclusive	ALK, UGT1A1
CBR3	APC	1	0	15	0	1	1	Mutually exclusive	APC, CBR3
CDKN2A	APC	1	0	15	0	1	1	Mutually exclusive	APC, CDKN2A
SMO	APC	1	0	15	0	1	1	Mutually exclusive	APC, SMO
UGT1A1	APC	1	0	15	0	1	1	Mutually exclusive	APC, UGT1A1
CDKN2A	CBR3	1	0	15	0	1	1	Mutually exclusive	CBR3, CDKN2A
FGFR3	CBR3	1	0	15	0	1	1	Mutually exclusive	CBR3, FGFR3
HRAS	CBR3	1	0	15	0	1	1	Mutually exclusive	CBR3, HRAS
RET	CBR3	1	0	15	0	1	1	Mutually exclusive	CBR3, RET
SMO	CBR3	1	0	15	0	1	1	Mutually exclusive	CBR3, SMO
SOD2	CBR3	1	0	15	0	1	1	Mutually exclusive	CBR3, SOD2
UGT1A1	CBR3	1	0	15	0	1	1	Mutually exclusive	CBR3, UGT1A1
FGFR3	CDKN2A	1	0	15	0	1	1	Mutually exclusive	CDKN2A, FGFR3
HRAS	CDKN2A	1	0	15	0	1	1	Mutually exclusive	CDKN2A, HRAS
RET	CDKN2A	1	0	15	0	1	1	Mutually exclusive	CDKN2A, RET
SMO	CDKN2A	1	0	15	0	1	1	Mutually exclusive	CDKN2A, SMO
SOD2	CDKN2A	1	0	15	0	1	1	Mutually exclusive	CDKN2A, SOD2
UGT1A1	CDKN2A	1	0	15	0	1	1	Mutually exclusive	CDKN2A, UGT1A1
SMO	FGFR3	1	0	15	0	1	1	Mutually exclusive	FGFR3, SMO
UGT1A1	FGFR3	1	0	15	0	1	1	Mutually exclusive	FGFR3, UGT1A1
SMO	HRAS	1	0	15	0	1	1	Mutually exclusive	HRAS, SMO
UGT1A1	HRAS	1	0	15	0	1	1	Mutually exclusive	HRAS, UGT1A1
SMO	RET	1	0	15	0	1	1	Mutually exclusive	RET, SMO
UGT1A1	RET	1	0	15	0	1	1	Mutually exclusive	RET, UGT1A1
SOD2	SMO	1	0	15	0	1	1	Mutually exclusive	SMO, SOD2
UGT1A1	SOD2	1	0	15	0	1	1	Mutually exclusive	SOD2, UGT1A1
B, Non-Hyp group (n=48)
Gene 1	Gene 2	P-value	Odds ratio	0	11	1	10	Event	Pair
NTRK1	KIT	0.000966184	Inf	44	2	0	0	Co-occurrence	KIT, NTRK1
KRAS	STK11	0.0168643	32.2325	41	2	1	2	Co-occurrence	KRAS, STK11
RET	ALK	0.0217391	Inf	45	1	0	0	Co-occurrence	ALK, RET
NOTCH1	BRAF	0.0217391	Inf	45	1	0	0	Co-occurrence	BRAF, NOTCH1
FGFR2	ESR1	0.0217391	Inf	45	1	0	0	Co-occurrence	ESR1, FGFR2
NOS3	ESR1	0.0217391	Inf	45	1	0	0	Co-occurrence	ESR1, NOS3
NOS3	FGFR2	0.0217391	Inf	45	1	0	0	Co-occurrence	FGFR2, NOS3
PDGFRA	GNAS	0.0217391	Inf	45	1	0	0	Co-occurrence	GNAS, PDGFRA
STK11	EGFR	0.0239789	0	11	0	32	3	Mutually exclusive	EGFR, STK11
BRAF	DPYD	0.0434783	Inf	44	1	1	0	Co-occurrence	BRAF, DPYD
NOTCH1	DPYD	0.0434783	Inf	44	1	1	0	Co-occurrence	DPYD, NOTCH1
ALK	FGFR3	0.0434783	Inf	44	1	1	0	Co-occurrence	ALK, FGFR3
ERBB2	FGFR3	0.0434783	Inf	44	1	1	0	Co-occurrence	ERBB2, FGFR3
RET	FGFR3	0.0434783	Inf	44	1	1	0	Co-occurrence	FGFR3, RET
ESR1	KIT	0.0434783	Inf	44	1	1	0	Co-occurrence	ESR1, KIT
FGFR2	KIT	0.0434783	Inf	44	1	1	0	Co-occurrence	FGFR2, KIT
GNAS	KIT	0.0434783	Inf	44	1	1	0	Co-occurrence	GNAS, KIT
NOS3	KIT	0.0434783	Inf	44	1	1	0	Co-occurrence	KIT, NOS3
PDGFRA	KIT	0.0434783	Inf	44	1	1	0	Co-occurrence	KIT, PDGFRA
ESR1	NTRK1	0.0434783	Inf	44	1	1	0	Co-occurrence	ESR1, NTRK1
FGFR2	NTRK1	0.0434783	Inf	44	1	1	0	Co-occurrence	FGFR2, NTRK1
GNAS	NTRK1	0.0434783	Inf	44	1	1	0	Co-occurrence	GNAS, NTRK1
NOS3	NTRK1	0.0434783	Inf	44	1	1	0	Co-occurrence	NOS3, NTRK1
PDGFRA	NTRK1	0.0434783	Inf	44	1	1	0	Co-occurrence	NTRK1, PDGFRA
GNAS	SOD2	0.0434783	Inf	44	1	1	0	Co-occurrence	GNAS, SOD2
PDGFRA	SOD2	0.0434783	Inf	44	1	1	0	Co-occurrence	PDGFRA, SOD2
ESR1	APC	0.0652174	Inf	43	1	2	0	Co-occurrence	APC, ESR1
FGFR2	APC	0.0652174	Inf	43	1	2	0	Co-occurrence	APC, FGFR2
NOS3	APC	0.0652174	Inf	43	1	2	0	Co-occurrence	APC, NOS3
GNAS	MAP2K1	0.0652174	Inf	43	1	2	0	Co-occurrence	GNAS, MAP2K1
PDGFRA	MAP2K1	0.0652174	Inf	43	1	2	0	Co-occurrence	MAP2K1, PDGFRA
ALK	TPMT	0.0652174	Inf	43	1	2	0	Co-occurrence	ALK, TPMT
RET	TPMT	0.0652174	Inf	43	1	2	0	Co-occurrence	RET, TPMT
KRAS	EGFR	0.0775133	0.124923	11	1	31	3	Mutually exclusive	EGFR, KRAS
SOD2	KIT	0.0859903	30.7353	43	1	1	1	Co-occurrence	KIT, SOD2
SOD2	NTRK1	0.0859903	30.7353	43	1	1	1	Co-occurrence	NTRK1, SOD2
ALK	KRAS	0.0869565	Inf	42	1	3	0	Co-occurrence	ALK, KRAS
RET	KRAS	0.0869565	Inf	42	1	3	0	Co-occurrence	KRAS, RET
TPMT	FGFR3	0.127536	17.3476	42	1	1	2	Co-occurrence	FGFR3, TPMT
APC	KIT	0.127536	17.3476	42	1	1	2	Co-occurrence	APC, KIT
MAP2K1	KIT	0.127536	17.3476	42	1	1	2	Co-occurrence	KIT, MAP2K1
APC	NTRK1	0.127536	17.3476	42	1	1	2	Co-occurrence	APC, NTRK1
MAP2K1	NTRK1	0.127536	17.3476	42	1	1	2	Co-occurrence	MAP2K1, NTRK1
CTNNB1	PIK3CA	0.127536	17.3476	42	1	1	2	Co-occurrence	CTNNB1, PIK3CA
MAP2K1	SOD2	0.127536	17.3476	42	1	1	2	Co-occurrence	MAP2K1, SOD2
FGFR3	KRAS	0.168116	11.9793	41	1	3	1	Co-occurrence	FGFR3, KRAS
RB1	APC	0.187022	9.15329	41	1	2	2	Co-occurrence	APC, RB1
MAP2K1	CTNNB1	0.187022	9.15329	41	1	2	2	Co-occurrence	CTNNB1, MAP2K1
RB1	CTNNB1	0.187022	9.15329	41	1	2	2	Co-occurrence	CTNNB1, RB1
EGFR	APC	0.21581	0.201723	12	1	2	31	Mutually exclusive	APC, EGFR
EGFR	MAP2K1	0.21581	0.201723	12	1	2	31	Mutually exclusive	EGFR, MAP2K1
APC	TP53	0.234783	Inf	22	3	21	0	Co-occurrence	APC, TP53
KRAS	TPMT	0.243742	6.17072	40	1	2	3	Co-occurrence	KRAS, TPMT
EGFR	BRAF	0.304348	0	13	0	1	32	Mutually exclusive	BRAF, EGFR
EGFR	ERBB2	0.304348	0	13	0	1	32	Mutually exclusive	EGFR, ERBB2
EGFR	NOTCH1	0.304348	0	13	0	1	32	Mutually exclusive	EGFR, NOTCH1
BRAF	TP53	0.478261	0	21	0	24	1	Mutually exclusive	BRAF, TP53
ERBB2	TP53	0.478261	0	21	0	24	1	Mutually exclusive	ERBB2, TP53
NOTCH1	TP53	0.478261	0	21	0	24	1	Mutually exclusive	NOTCH1, TP53
TP53	KIT	0.489855	Inf	22	2	0	22	Co-occurrence	KIT, TP53
TP53	NTRK1	0.489855	Inf	22	2	0	22	Co-occurrence	NTRK1, TP53
TP53	SOD2	0.489855	Inf	22	2	0	22	Co-occurrence	SOD2, TP53
DPYD	EGFR	0.520773	0.428327	13	1	31	1	Mutually exclusive	DPYD, EGFR
FGFR3	EGFR	0.520773	0.428327	13	1	31	1	Mutually exclusive	EGFR, FGFR3
PIK3CA	EGFR	0.520773	0.428327	13	1	31	1	Mutually exclusive	EGFR, PIK3CA
TPMT	EGFR	0.542556	Inf	14	3	29	0	Co-occurrence	EGFR, TPMT
KRAS	TP53	0.609302	2.93437	21	3	21	1	Co-occurrence	KRAS, TP53
BRAF	ALK	1	0	44	0	1	1	Mutually exclusive	ALK, BRAF
ERBB2	ALK	1	0	44	0	1	1	Mutually exclusive	ALK, ERBB2
ESR1	ALK	1	0	44	0	1	1	Mutually exclusive	ALK, ESR1
FGFR2	ALK	1	0	44	0	1	1	Mutually exclusive	ALK, FGFR2
GNAS	ALK	1	0	44	0	1	1	Mutually exclusive	ALK, GNAS
NOS3	ALK	1	0	44	0	1	1	Mutually exclusive	ALK, NOS3
NOTCH1	ALK	1	0	44	0	1	1	Mutually exclusive	ALK, NOTCH1
PDGFRA	ALK	1	0	44	0	1	1	Mutually exclusive	ALK, PDGFRA
ERBB2	BRAF	1	0	44	0	1	1	Mutually exclusive	BRAF, ERBB2
ESR1	BRAF	1	0	44	0	1	1	Mutually exclusive	BRAF, ESR1
FGFR2	BRAF	1	0	44	0	1	1	Mutually exclusive	BRAF, FGFR2
GNAS	BRAF	1	0	44	0	1	1	Mutually exclusive	BRAF, GNAS
NOS3	BRAF	1	0	44	0	1	1	Mutually exclusive	BRAF, NOS3
PDGFRA	BRAF	1	0	44	0	1	1	Mutually exclusive	BRAF, PDGFRA
RET	BRAF	1	0	44	0	1	1	Mutually exclusive	BRAF, RET
ESR1	ERBB2	1	0	44	0	1	1	Mutually exclusive	ERBB2, ESR1
FGFR2	ERBB2	1	0	44	0	1	1	Mutually exclusive	ERBB2, FGFR2
GNAS	ERBB2	1	0	44	0	1	1	Mutually exclusive	ERBB2, GNAS
NOS3	ERBB2	1	0	44	0	1	1	Mutually exclusive	ERBB2, NOS3
NOTCH1	ERBB2	1	0	44	0	1	1	Mutually exclusive	ERBB2, NOTCH1
PDGFRA	ERBB2	1	0	44	0	1	1	Mutually exclusive	ERBB2, PDGFRA
RET	ERBB2	1	0	44	0	1	1	Mutually exclusive	ERBB2, RET
GNAS	ESR1	1	0	44	0	1	1	Mutually exclusive	ESR1, GNAS
NOTCH1	ESR1	1	0	44	0	1	1	Mutually exclusive	ESR1, NOTCH1
PDGFRA	ESR1	1	0	44	0	1	1	Mutually exclusive	ESR1, PDGFRA
RET	ESR1	1	0	44	0	1	1	Mutually exclusive	ESR1, RET
GNAS	FGFR2	1	0	44	0	1	1	Mutually exclusive	FGFR2, GNAS
NOTCH1	FGFR2	1	0	44	0	1	1	Mutually exclusive	FGFR2, NOTCH1
PDGFRA	FGFR2	1	0	44	0	1	1	Mutually exclusive	FGFR2, PDGFRA
RET	FGFR2	1	0	44	0	1	1	Mutually exclusive	FGFR2, RET
NOS3	GNAS	1	0	44	0	1	1	Mutually exclusive	GNAS, NOS3
NOTCH1	GNAS	1	0	44	0	1	1	Mutually exclusive	GNAS, NOTCH1
RET	GNAS	1	0	44	0	1	1	Mutually exclusive	GNAS, RET
NOTCH1	NOS3	1	0	44	0	1	1	Mutually exclusive	NOS3, NOTCH1
PDGFRA	NOS3	1	0	44	0	1	1	Mutually exclusive	NOS3, PDGFRA
RET	NOS3	1	0	44	0	1	1	Mutually exclusive	NOS3, RET
PDGFRA	NOTCH1	1	0	44	0	1	1	Mutually exclusive	NOTCH1, PDGFRA
RET	NOTCH1	1	0	44	0	1	1	Mutually exclusive	NOTCH1, RET
RET	PDGFRA	1	0	44	0	1	1	Mutually exclusive	PDGFRA, RET
CYP2D6	EGFR	1	Inf	14	2	30	0	Co-occurrence	CYP2D6, EGFR
KIT	EGFR	1	Inf	14	2	30	0	Co-occurrence	EGFR, KIT
NTRK1	EGFR	1	Inf	14	2	30	0	Co-occurrence	EGFR, NTRK1
SOD2	EGFR	1	Inf	14	2	30	0	Co-occurrence	EGFR, SOD2
EGFR	TP53	1	1.13025	7	17	7	15	Co-occurrence	EGFR, TP53
KRAS	APC	1	0	39	0	3	4	Mutually exclusive	APC, KRAS
KRAS	CTNNB1	1	0	39	0	3	4	Mutually exclusive	CTNNB1, KRAS
KRAS	MAP2K1	1	0	39	0	3	4	Mutually exclusive	KRAS, MAP2K1
KRAS	RB1	1	0	39	0	3	4	Mutually exclusive	KRAS, RB1
KRAS	CYP2D6	1	0	40	0	2	4	Mutually exclusive	CYP2D6, KRAS
DPYD	CYP2D6	1	0	42	0	2	2	Mutually exclusive	CYP2D6, DPYD
FGFR3	CYP2D6	1	0	42	0	2	2	Mutually exclusive	CYP2D6, FGFR3
KIT	CYP2D6	1	0	42	0	2	2	Mutually exclusive	CYP2D6, KIT
NTRK1	CYP2D6	1	0	42	0	2	2	Mutually exclusive	CYP2D6, NTRK1
PIK3CA	CYP2D6	1	0	42	0	2	2	Mutually exclusive	CYP2D6, PIK3CA
SOD2	CYP2D6	1	0	42	0	2	2	Mutually exclusive	CYP2D6, SOD2
KRAS	DPYD	1	0	40	0	2	4	Mutually exclusive	DPYD, KRAS
FGFR3	DPYD	1	0	42	0	2	2	Mutually exclusive	DPYD, FGFR3
KIT	DPYD	1	0	42	0	2	2	Mutually exclusive	DPYD, KIT
NTRK1	DPYD	1	0	42	0	2	2	Mutually exclusive	DPYD, NTRK1
PIK3CA	DPYD	1	0	42	0	2	2	Mutually exclusive	DPYD, PIK3CA
SOD2	DPYD	1	0	42	0	2	2	Mutually exclusive	DPYD, SOD2
KIT	FGFR3	1	0	42	0	2	2	Mutually exclusive	FGFR3, KIT
NTRK1	FGFR3	1	0	42	0	2	2	Mutually exclusive	FGFR3, NTRK1
PIK3CA	FGFR3	1	0	42	0	2	2	Mutually exclusive	FGFR3, PIK3CA
SOD2	FGFR3	1	0	42	0	2	2	Mutually exclusive	FGFR3, SOD2
KRAS	KIT	1	0	40	0	2	4	Mutually exclusive	KIT, KRAS
PIK3CA	KIT	1	0	42	0	2	2	Mutually exclusive	KIT, PIK3CA
KRAS	NTRK1	1	0	40	0	2	4	Mutually exclusive	KRAS, NTRK1
PIK3CA	NTRK1	1	0	42	0	2	2	Mutually exclusive	NTRK1, PIK3CA
KRAS	PIK3CA	1	0	40	0	2	4	Mutually exclusive	KRAS, PIK3CA
SOD2	PIK3CA	1	0	42	0	2	2	Mutually exclusive	PIK3CA, SOD2
KRAS	SOD2	1	0	40	0	2	4	Mutually exclusive	KRAS, SOD2
EGFR	ALK	1	Inf	14	1	0	31	Co-occurrence	ALK, EGFR
EGFR	ESR1	1	Inf	14	1	0	31	Co-occurrence	EGFR, ESR1
EGFR	FGFR2	1	Inf	14	1	0	31	Co-occurrence	EGFR, FGFR2
EGFR	GNAS	1	Inf	14	1	0	31	Co-occurrence	EGFR, GNAS
EGFR	NOS3	1	Inf	14	1	0	31	Co-occurrence	EGFR, NOS3
EGFR	PDGFRA	1	Inf	14	1	0	31	Co-occurrence	EGFR, PDGFRA
EGFR	RET	1	Inf	14	1	0	31	Co-occurrence	EGFR, RET
CTNNB1	EGFR	1	0.869442	13	2	30	1	Mutually exclusive	CTNNB1, EGFR
RB1	EGFR	1	0.869442	13	2	30	1	Mutually exclusive	EGFR, RB1
CTNNB1	TP53	1	1.88337	21	2	22	1	Co-occurrence	CTNNB1, TP53
MAP2K1	TP53	1	1.88337	21	2	22	1	Co-occurrence	MAP2K1, TP53
RB1	TP53	1	1.88337	21	2	22	1	Co-occurrence	RB1, TP53
STK11	TP53	1	1.88337	21	2	22	1	Co-occurrence	STK11, TP53
TPMT	TP53	1	1.88337	21	2	22	1	Co-occurrence	TP53, TPMT
CYP2D6	TP53	1	0.914856	21	1	23	1	Mutually exclusive	CYP2D6, TP53
DPYD	TP53	1	0.914856	21	1	23	1	Mutually exclusive	DPYD, TP53
FGFR3	TP53	1	0.914856	21	1	23	1	Mutually exclusive	FGFR3, TP53
PIK3CA	TP53	1	0.914856	21	1	23	1	Mutually exclusive	PIK3CA, TP53
ALK	TP53	1	Inf	22	1	23	0	Co-occurrence	ALK, TP53
ESR1	TP53	1	Inf	22	1	23	0	Co-occurrence	ESR1, TP53
FGFR2	TP53	1	Inf	22	1	23	0	Co-occurrence	FGFR2, TP53
GNAS	TP53	1	Inf	22	1	23	0	Co-occurrence	GNAS, TP53
NOS3	TP53	1	Inf	22	1	23	0	Co-occurrence	NOS3, TP53
PDGFRA	TP53	1	Inf	22	1	23	0	Co-occurrence	PDGFRA, TP53
RET	TP53	1	Inf	22	1	23	0	Co-occurrence	RET, TP53
BRAF	KRAS	1	0	41	0	4	1	Mutually exclusive	BRAF, KRAS
ERBB2	KRAS	1	0	41	0	4	1	Mutually exclusive	ERBB2, KRAS
ESR1	KRAS	1	0	41	0	4	1	Mutually exclusive	ESR1, KRAS
FGFR2	KRAS	1	0	41	0	4	1	Mutually exclusive	FGFR2, KRAS
GNAS	KRAS	1	0	41	0	4	1	Mutually exclusive	GNAS, KRAS
NOS3	KRAS	1	0	41	0	4	1	Mutually exclusive	KRAS, NOS3
NOTCH1	KRAS	1	0	41	0	4	1	Mutually exclusive	KRAS, NOTCH1
PDGFRA	KRAS	1	0	41	0	4	1	Mutually exclusive	KRAS, PDGFRA
CTNNB1	APC	1	0	40	0	3	3	Mutually exclusive	APC, CTNNB1
MAP2K1	APC	1	0	40	0	3	3	Mutually exclusive	APC, MAP2K1
STK11	APC	1	0	40	0	3	3	Mutually exclusive	APC, STK11
TPMT	APC	1	0	40	0	3	3	Mutually exclusive	APC, TPMT
CYP2D6	APC	1	0	41	0	3	2	Mutually exclusive	APC, CYP2D6
DPYD	APC	1	0	41	0	3	2	Mutually exclusive	APC, DPYD
FGFR3	APC	1	0	41	0	3	2	Mutually exclusive	APC, FGFR3
PIK3CA	APC	1	0	41	0	3	2	Mutually exclusive	APC, PIK3CA
SOD2	APC	1	0	41	0	3	2	Mutually exclusive	APC, SOD2
ALK	APC	1	0	42	0	3	1	Mutually exclusive	ALK, APC
BRAF	APC	1	0	42	0	3	1	Mutually exclusive	APC, BRAF
ERBB2	APC	1	0	42	0	3	1	Mutually exclusive	APC, ERBB2
GNAS	APC	1	0	42	0	3	1	Mutually exclusive	APC, GNAS
NOTCH1	APC	1	0	42	0	3	1	Mutually exclusive	APC, NOTCH1
PDGFRA	APC	1	0	42	0	3	1	Mutually exclusive	APC, PDGFRA
RET	APC	1	0	42	0	3	1	Mutually exclusive	APC, RET
STK11	CTNNB1	1	0	40	0	3	3	Mutually exclusive	CTNNB1, STK11
TPMT	CTNNB1	1	0	40	0	3	3	Mutually exclusive	CTNNB1, TPMT
CYP2D6	CTNNB1	1	0	41	0	3	2	Mutually exclusive	CTNNB1, CYP2D6
DPYD	CTNNB1	1	0	41	0	3	2	Mutually exclusive	CTNNB1, DPYD
FGFR3	CTNNB1	1	0	41	0	3	2	Mutually exclusive	CTNNB1, FGFR3
KIT	CTNNB1	1	0	41	0	3	2	Mutually exclusive	CTNNB1, KIT
NTRK1	CTNNB1	1	0	41	0	3	2	Mutually exclusive	CTNNB1, NTRK1
SOD2	CTNNB1	1	0	41	0	3	2	Mutually exclusive	CTNNB1, SOD2
ALK	CTNNB1	1	0	42	0	3	1	Mutually exclusive	ALK, CTNNB1
BRAF	CTNNB1	1	0	42	0	3	1	Mutually exclusive	BRAF, CTNNB1
ERBB2	CTNNB1	1	0	42	0	3	1	Mutually exclusive	CTNNB1, ERBB2
ESR1	CTNNB1	1	0	42	0	3	1	Mutually exclusive	CTNNB1, ESR1
FGFR2	CTNNB1	1	0	42	0	3	1	Mutually exclusive	CTNNB1, FGFR2
GNAS	CTNNB1	1	0	42	0	3	1	Mutually exclusive	CTNNB1, GNAS
NOS3	CTNNB1	1	0	42	0	3	1	Mutually exclusive	CTNNB1, NOS3
NOTCH1	CTNNB1	1	0	42	0	3	1	Mutually exclusive	CTNNB1, NOTCH1
PDGFRA	CTNNB1	1	0	42	0	3	1	Mutually exclusive	CTNNB1, PDGFRA
RET	CTNNB1	1	0	42	0	3	1	Mutually exclusive	CTNNB1, RET
RB1	MAP2K1	1	0	40	0	3	3	Mutually exclusive	MAP2K1, RB1
STK11	MAP2K1	1	0	40	0	3	3	Mutually exclusive	MAP2K1, STK11
TPMT	MAP2K1	1	0	40	0	3	3	Mutually exclusive	MAP2K1, TPMT
CYP2D6	MAP2K1	1	0	41	0	3	2	Mutually exclusive	CYP2D6, MAP2K1
DPYD	MAP2K1	1	0	41	0	3	2	Mutually exclusive	DPYD, MAP2K1
FGFR3	MAP2K1	1	0	41	0	3	2	Mutually exclusive	FGFR3, MAP2K1
PIK3CA	MAP2K1	1	0	41	0	3	2	Mutually exclusive	MAP2K1, PIK3CA
ALK	MAP2K1	1	0	42	0	3	1	Mutually exclusive	ALK, MAP2K1
BRAF	MAP2K1	1	0	42	0	3	1	Mutually exclusive	BRAF, MAP2K1
ERBB2	MAP2K1	1	0	42	0	3	1	Mutually exclusive	ERBB2, MAP2K1
ESR1	MAP2K1	1	0	42	0	3	1	Mutually exclusive	ESR1, MAP2K1
FGFR2	MAP2K1	1	0	42	0	3	1	Mutually exclusive	FGFR2, MAP2K1
NOS3	MAP2K1	1	0	42	0	3	1	Mutually exclusive	MAP2K1, NOS3
NOTCH1	MAP2K1	1	0	42	0	3	1	Mutually exclusive	MAP2K1, NOTCH1
RET	MAP2K1	1	0	42	0	3	1	Mutually exclusive	MAP2K1, RET
STK11	RB1	1	0	40	0	3	3	Mutually exclusive	RB1, STK11
TPMT	RB1	1	0	40	0	3	3	Mutually exclusive	RB1, TPMT
CYP2D6	RB1	1	0	41	0	3	2	Mutually exclusive	CYP2D6, RB1
DPYD	RB1	1	0	41	0	3	2	Mutually exclusive	DPYD, RB1
FGFR3	RB1	1	0	41	0	3	2	Mutually exclusive	FGFR3, RB1
KIT	RB1	1	0	41	0	3	2	Mutually exclusive	KIT, RB1
NTRK1	RB1	1	0	41	0	3	2	Mutually exclusive	NTRK1, RB1
PIK3CA	RB1	1	0	41	0	3	2	Mutually exclusive	PIK3CA, RB1
SOD2	RB1	1	0	41	0	3	2	Mutually exclusive	RB1, SOD2
ALK	RB1	1	0	42	0	3	1	Mutually exclusive	ALK, RB1
BRAF	RB1	1	0	42	0	3	1	Mutually exclusive	BRAF, RB1
ERBB2	RB1	1	0	42	0	3	1	Mutually exclusive	ERBB2, RB1
ESR1	RB1	1	0	42	0	3	1	Mutually exclusive	ESR1, RB1
FGFR2	RB1	1	0	42	0	3	1	Mutually exclusive	FGFR2, RB1
GNAS	RB1	1	0	42	0	3	1	Mutually exclusive	GNAS, RB1
NOS3	RB1	1	0	42	0	3	1	Mutually exclusive	NOS3, RB1
NOTCH1	RB1	1	0	42	0	3	1	Mutually exclusive	NOTCH1, RB1
PDGFRA	RB1	1	0	42	0	3	1	Mutually exclusive	PDGFRA, RB1
RET	RB1	1	0	42	0	3	1	Mutually exclusive	RB1, RET
TPMT	STK11	1	0	40	0	3	3	Mutually exclusive	STK11, TPMT
CYP2D6	STK11	1	0	41	0	3	2	Mutually exclusive	CYP2D6, STK11
DPYD	STK11	1	0	41	0	3	2	Mutually exclusive	DPYD, STK11
FGFR3	STK11	1	0	41	0	3	2	Mutually exclusive	FGFR3, STK11
KIT	STK11	1	0	41	0	3	2	Mutually exclusive	KIT, STK11
NTRK1	STK11	1	0	41	0	3	2	Mutually exclusive	NTRK1, STK11
PIK3CA	STK11	1	0	41	0	3	2	Mutually exclusive	PIK3CA, STK11
SOD2	STK11	1	0	41	0	3	2	Mutually exclusive	SOD2, STK11
ALK	STK11	1	0	42	0	3	1	Mutually exclusive	ALK, STK11
BRAF	STK11	1	0	42	0	3	1	Mutually exclusive	BRAF, STK11
ERBB2	STK11	1	0	42	0	3	1	Mutually exclusive	ERBB2, STK11
ESR1	STK11	1	0	42	0	3	1	Mutually exclusive	ESR1, STK11
FGFR2	STK11	1	0	42	0	3	1	Mutually exclusive	FGFR2, STK11
GNAS	STK11	1	0	42	0	3	1	Mutually exclusive	GNAS, STK11
NOS3	STK11	1	0	42	0	3	1	Mutually exclusive	NOS3, STK11
NOTCH1	STK11	1	0	42	0	3	1	Mutually exclusive	NOTCH1, STK11
PDGFRA	STK11	1	0	42	0	3	1	Mutually exclusive	PDGFRA, STK11
RET	STK11	1	0	42	0	3	1	Mutually exclusive	RET, STK11
CYP2D6	TPMT	1	0	41	0	3	2	Mutually exclusive	CYP2D6, TPMT
DPYD	TPMT	1	0	41	0	3	2	Mutually exclusive	DPYD, TPMT
KIT	TPMT	1	0	41	0	3	2	Mutually exclusive	KIT, TPMT
NTRK1	TPMT	1	0	41	0	3	2	Mutually exclusive	NTRK1, TPMT
PIK3CA	TPMT	1	0	41	0	3	2	Mutually exclusive	PIK3CA, TPMT
SOD2	TPMT	1	0	41	0	3	2	Mutually exclusive	SOD2, TPMT
BRAF	TPMT	1	0	42	0	3	1	Mutually exclusive	BRAF, TPMT
ERBB2	TPMT	1	0	42	0	3	1	Mutually exclusive	ERBB2, TPMT
ESR1	TPMT	1	0	42	0	3	1	Mutually exclusive	ESR1, TPMT
FGFR2	TPMT	1	0	42	0	3	1	Mutually exclusive	FGFR2, TPMT
GNAS	TPMT	1	0	42	0	3	1	Mutually exclusive	GNAS, TPMT
NOS3	TPMT	1	0	42	0	3	1	Mutually exclusive	NOS3, TPMT
NOTCH1	TPMT	1	0	42	0	3	1	Mutually exclusive	NOTCH1, TPMT
PDGFRA	TPMT	1	0	42	0	3	1	Mutually exclusive	PDGFRA, TPMT
ALK	CYP2D6	1	0	43	0	2	1	Mutually exclusive	ALK, CYP2D6
BRAF	CYP2D6	1	0	43	0	2	1	Mutually exclusive	BRAF, CYP2D6
ERBB2	CYP2D6	1	0	43	0	2	1	Mutually exclusive	CYP2D6, ERBB2
ESR1	CYP2D6	1	0	43	0	2	1	Mutually exclusive	CYP2D6, ESR1
FGFR2	CYP2D6	1	0	43	0	2	1	Mutually exclusive	CYP2D6, FGFR2
GNAS	CYP2D6	1	0	43	0	2	1	Mutually exclusive	CYP2D6, GNAS
NOS3	CYP2D6	1	0	43	0	2	1	Mutually exclusive	CYP2D6, NOS3
NOTCH1	CYP2D6	1	0	43	0	2	1	Mutually exclusive	CYP2D6, NOTCH1
PDGFRA	CYP2D6	1	0	43	0	2	1	Mutually exclusive	CYP2D6, PDGFRA
RET	CYP2D6	1	0	43	0	2	1	Mutually exclusive	CYP2D6, RET
ALK	DPYD	1	0	43	0	2	1	Mutually exclusive	ALK, DPYD
ERBB2	DPYD	1	0	43	0	2	1	Mutually exclusive	DPYD, ERBB2
ESR1	DPYD	1	0	43	0	2	1	Mutually exclusive	DPYD, ESR1
FGFR2	DPYD	1	0	43	0	2	1	Mutually exclusive	DPYD, FGFR2
GNAS	DPYD	1	0	43	0	2	1	Mutually exclusive	DPYD, GNAS
NOS3	DPYD	1	0	43	0	2	1	Mutually exclusive	DPYD, NOS3
PDGFRA	DPYD	1	0	43	0	2	1	Mutually exclusive	DPYD, PDGFRA
RET	DPYD	1	0	43	0	2	1	Mutually exclusive	DPYD, RET
BRAF	FGFR3	1	0	43	0	2	1	Mutually exclusive	BRAF, FGFR3
ESR1	FGFR3	1	0	43	0	2	1	Mutually exclusive	ESR1, FGFR3
FGFR2	FGFR3	1	0	43	0	2	1	Mutually exclusive	FGFR2, FGFR3
GNAS	FGFR3	1	0	43	0	2	1	Mutually exclusive	FGFR3, GNAS
NOS3	FGFR3	1	0	43	0	2	1	Mutually exclusive	FGFR3, NOS3
NOTCH1	FGFR3	1	0	43	0	2	1	Mutually exclusive	FGFR3, NOTCH1
PDGFRA	FGFR3	1	0	43	0	2	1	Mutually exclusive	FGFR3, PDGFRA
ALK	KIT	1	0	43	0	2	1	Mutually exclusive	ALK, KIT
BRAF	KIT	1	0	43	0	2	1	Mutually exclusive	BRAF, KIT
ERBB2	KIT	1	0	43	0	2	1	Mutually exclusive	ERBB2, KIT
NOTCH1	KIT	1	0	43	0	2	1	Mutually exclusive	KIT, NOTCH1
RET	KIT	1	0	43	0	2	1	Mutually exclusive	KIT, RET
ALK	NTRK1	1	0	43	0	2	1	Mutually exclusive	ALK, NTRK1
BRAF	NTRK1	1	0	43	0	2	1	Mutually exclusive	BRAF, NTRK1
ERBB2	NTRK1	1	0	43	0	2	1	Mutually exclusive	ERBB2, NTRK1
NOTCH1	NTRK1	1	0	43	0	2	1	Mutually exclusive	NOTCH1, NTRK1
RET	NTRK1	1	0	43	0	2	1	Mutually exclusive	NTRK1, RET
ALK	PIK3CA	1	0	43	0	2	1	Mutually exclusive	ALK, PIK3CA
BRAF	PIK3CA	1	0	43	0	2	1	Mutually exclusive	BRAF, PIK3CA
ERBB2	PIK3CA	1	0	43	0	2	1	Mutually exclusive	ERBB2, PIK3CA
ESR1	PIK3CA	1	0	43	0	2	1	Mutually exclusive	ESR1, PIK3CA
FGFR2	PIK3CA	1	0	43	0	2	1	Mutually exclusive	FGFR2, PIK3CA
GNAS	PIK3CA	1	0	43	0	2	1	Mutually exclusive	GNAS, PIK3CA
NOS3	PIK3CA	1	0	43	0	2	1	Mutually exclusive	NOS3, PIK3CA
NOTCH1	PIK3CA	1	0	43	0	2	1	Mutually exclusive	NOTCH1, PIK3CA
PDGFRA	PIK3CA	1	0	43	0	2	1	Mutually exclusive	PDGFRA, PIK3CA
RET	PIK3CA	1	0	43	0	2	1	Mutually exclusive	PIK3CA, RET
ALK	SOD2	1	0	43	0	2	1	Mutually exclusive	ALK, SOD2
BRAF	SOD2	1	0	43	0	2	1	Mutually exclusive	BRAF, SOD2
ERBB2	SOD2	1	0	43	0	2	1	Mutually exclusive	ERBB2, SOD2
ESR1	SOD2	1	0	43	0	2	1	Mutually exclusive	ESR1, SOD2
FGFR2	SOD2	1	0	43	0	2	1	Mutually exclusive	FGFR2, SOD2
NOS3	SOD2	1	0	43	0	2	1	Mutually exclusive	NOS3, SOD2
NOTCH1	SOD2	1	0	43	0	2	1	Mutually exclusive	NOTCH1, SOD2
RET	SOD2	1	0	43	0	2	1	Mutually exclusive	RET, SOD2
Hyp group, hypertension group; Inf; non-Hyp group, non-hypertension group; Inf, infinity. In maftools, Fisher's Exact Test is utilized to assess the co-occurrence and mutual exclusivity of two genes, specifically Gene A and Gene B. In this context, "00" represents the number of samples in which neither Gene A nor Gene B is mutated, "11" indicates the number of samples where both genes are mutated…
